# Supplementary material for: Odor Concentration Change Coding in the Olfactory Bulb
Source: eNeuro. 2019 Feb 27;6(1):ENEURO.0396-18.2019. doi: 10.1523/ENEURO.0396-18.2019 (PMC6397952; doi:10.1523/ENEURO.0396-18.2019)
Supplement: Figure 4-2 — Download Figure 4-2, PDF file. [file sup_enu-eN-NWR-0396-18-s05.pdf]

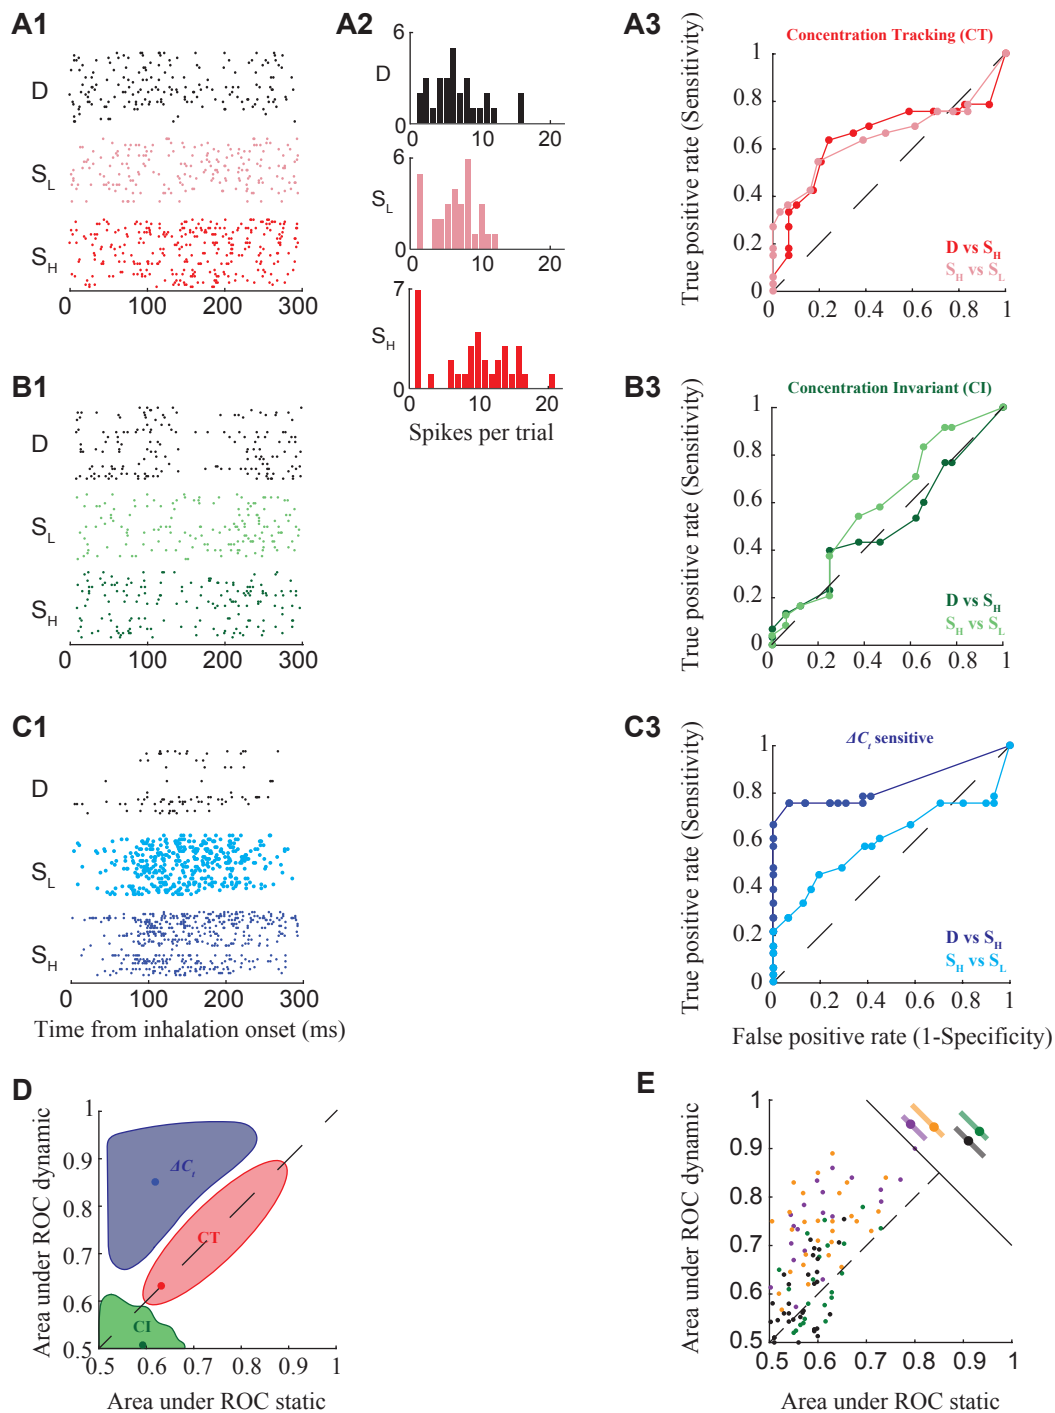

### Extended Data Figure 4-2. ROC analysis separates different response types.

**A1.** Raster plots of a concentration tracking (*CT*) cell-odor pair on the 3<sup>rd</sup> sniff cycle to static high (red) and static low (pink) and step (black) stimuli. **A2.** Full sniff spike count histogram for each response from **A1**. **A3.** ROC curves between the static odor stimuli: high and low (pink), and between step and corresponding static (red). **B.** Same as **A**, but for an example concentration invariant (*CI*) response. **C.** Same as **A**, but for an example  $\Delta C_i$  sensitive response. **D.** Expected distribution of responses. *CT* responses will be distributed within the green area, *CT* responses will be distributed along diagonal, and  $\Delta C_i$  responses will be distributed above diagonal. **e.** Scatter plot of  $\Delta C_i$  discriminability against static stimulus discriminability. *CI*, *CT*,  $+\Delta C_i$  and  $-\Delta C_i$  marked by black, green orange and blue color, respectively. Adjacent panel shows the means and STDs of the response discriminability differences.
