# Supplementary material for: Odor Concentration Change Coding in the Olfactory Bulb
Source: PubMed Central journal article supplement (PMC6397952; doi:10.1523/eneuro.0396-18.2019), 2019-02-27
Supplement: sup_enu-eN-NWR-0396-18-s01.pdf [file sup_enu-eN-NWR-0396-18-s01.pdf]

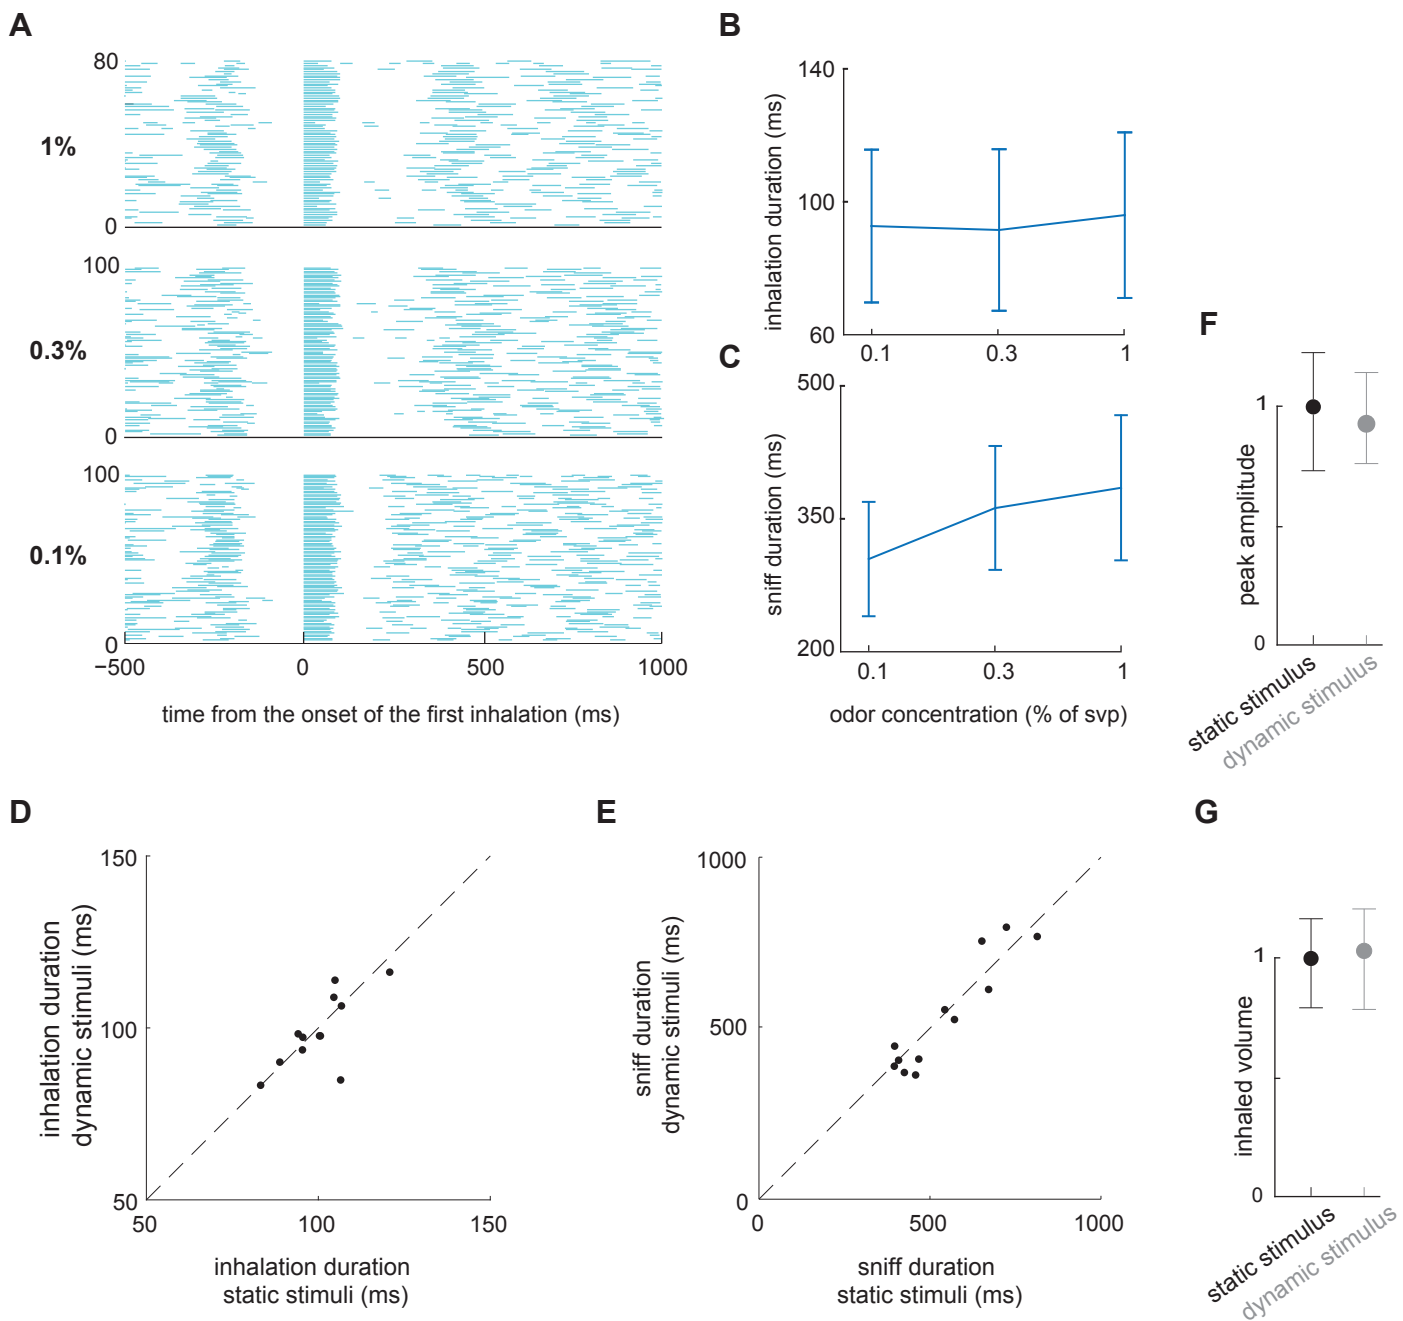

### Extended data Figure 5. Variation in sniff parameters with static and dynamic stimuli.

**A.** Raster plots of inhalations to 3 concentrations of Amyl Acetate, aligned by the onset of the first odorized inhalation. Blue lines represent the inhalation intervals, while white space indicates exhalation intervals. **B.** Mean and standard deviation of inhalation duration distributions on 1st odorized cycle as function of odor concentration. **C.** Same as (B) for whole sniff durations. **D.** Comparison of inhalation duration on the 3<sup>rd</sup> sniff cycle for static vs. dynamic stimuli of Amyl Acetate. Each dot represents different session. **E.** Same as (D) for whole sniff duration. **F.** Comparison of peak amplitude on the 3<sup>rd</sup> sniff cycle for static vs. dynamic stimuli. Peak amplitude of both dynamic and static sniffs during each session were normalized to an average peak amplitude of static sniff cycle. **G.** Same as (F) for inhaled volume.
