# Supplementary material for: Odor Concentration Change Coding in the Olfactory Bulb
Source: PubMed Central journal article supplement (PMC6397952; doi:10.1523/eneuro.0396-18.2019), 2019-02-27
Supplement: sup_enu-eN-NWR-0396-18-s04.pdf [file sup_enu-eN-NWR-0396-18-s04.pdf]

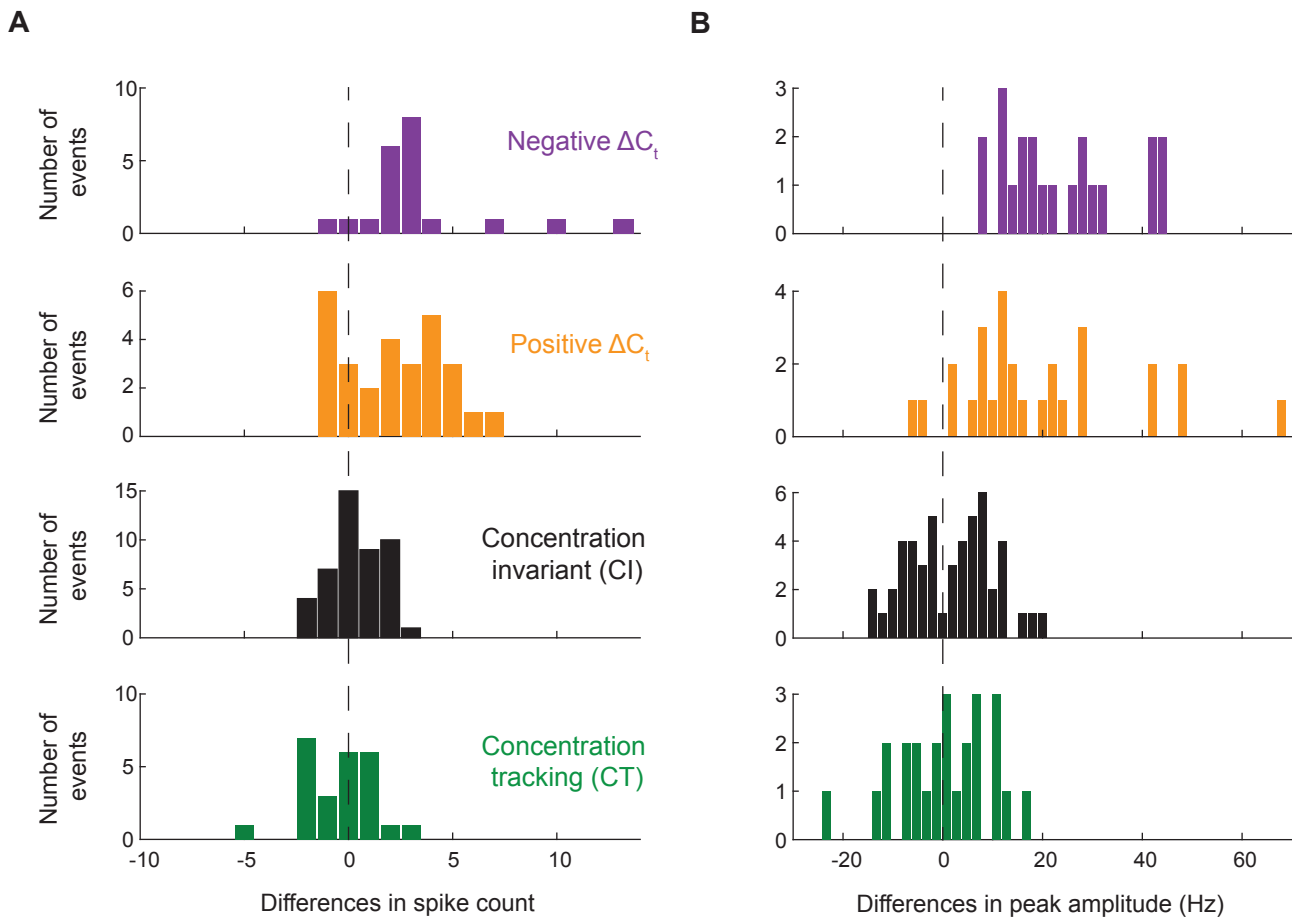

**Extended Data Figure 4-1. Distributions of differences in amplitude and spike count due to contrast increase.**

**A.** Distributions of the spike count differences between two static stimuli against differences between dynamic and static stimuli, on the 3rd sniff cycle.  $-\Delta C_t$ ,  $+\Delta C_t$ , *CI*, and *CT*, marked by purple, orange, black, and green color, respectively. This subplot complements Fig. 4C. **B.** Same as (A) for peak amplitude differences. This complements Fig. 4D.
