# Supplementary material for: Odor Concentration Change Coding in the Olfactory Bulb
Source: PubMed Central journal article supplement (PMC6397952; doi:10.1523/eneuro.0396-18.2019), 2019-02-27
Supplement: sup_enu-eN-NWR-0396-18-s06.pdf [file sup_enu-eN-NWR-0396-18-s06.pdf]

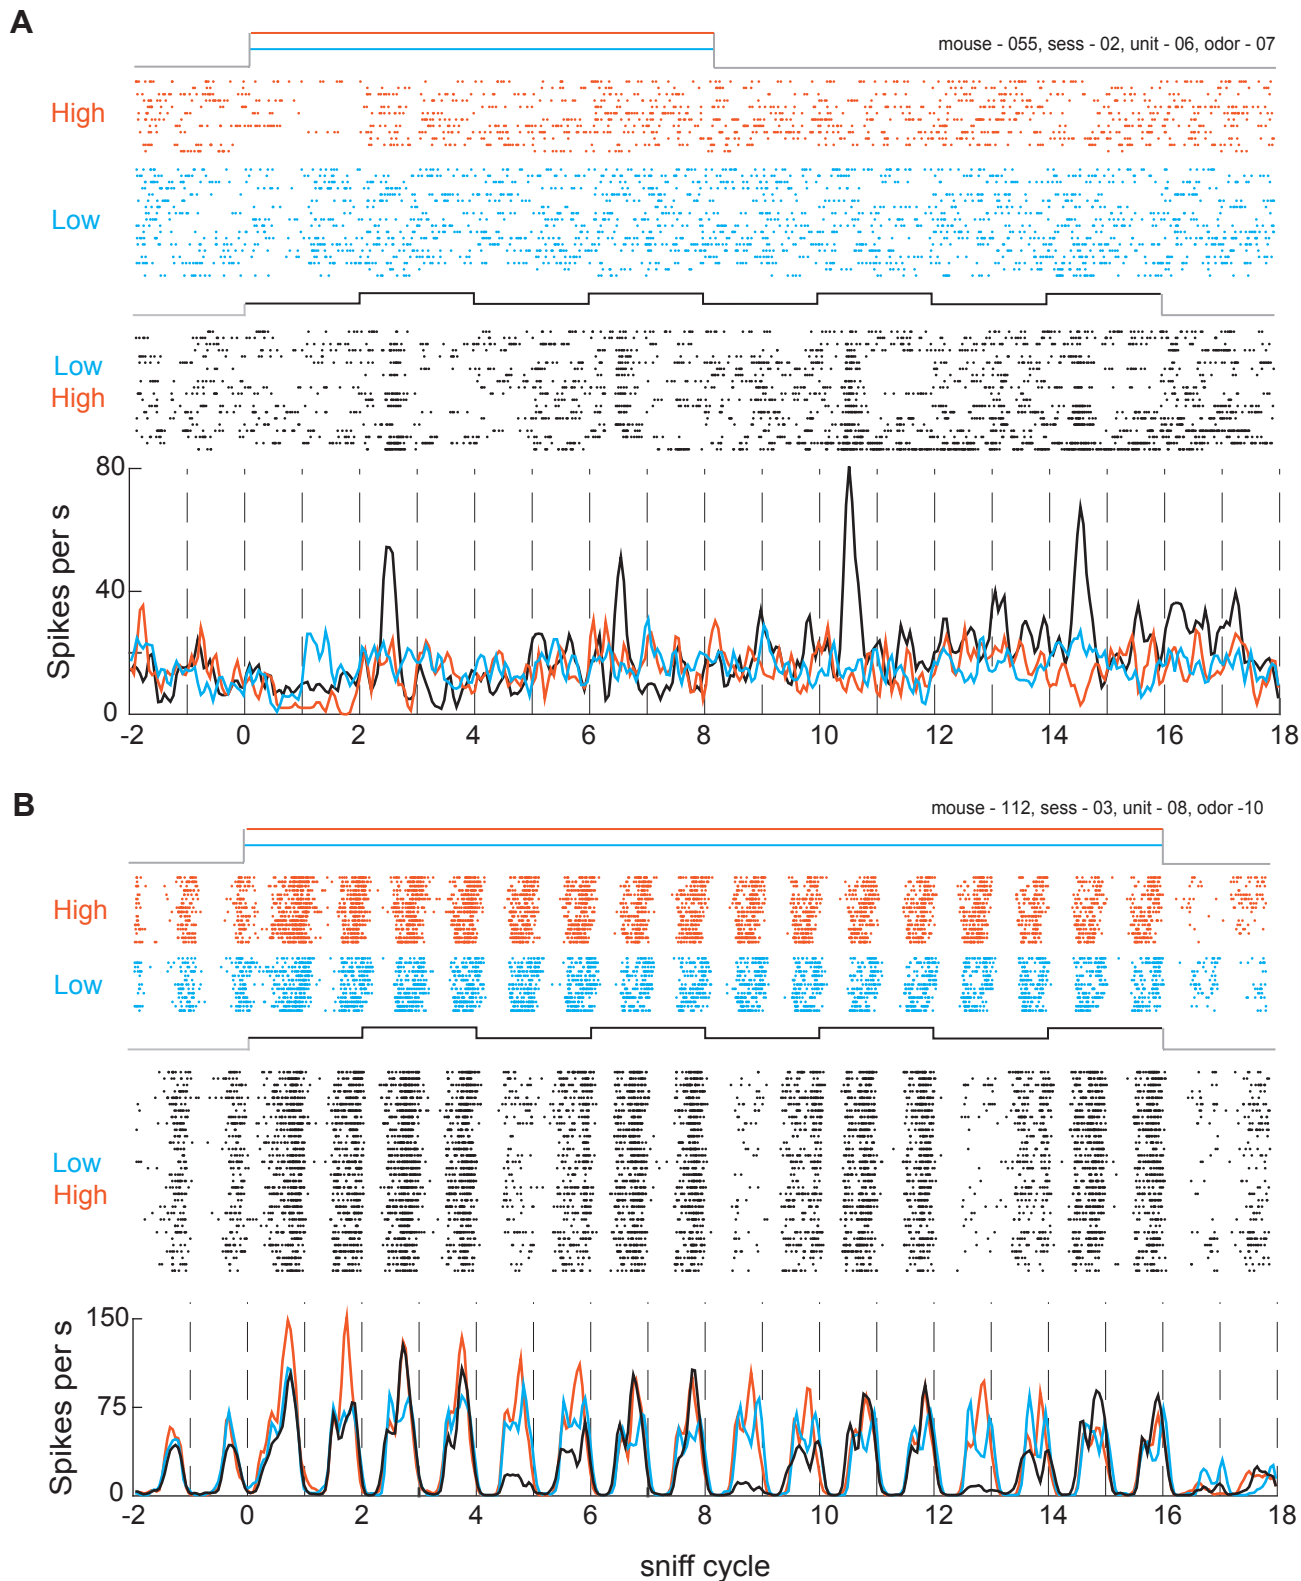

**Extended data Figure 2-1.  $\Delta C_f$ -sensitive responses to prolonged concentration step stimuli.**

**A.** Raster and PSTH plots of M/T cell response to static high concentration (orange), static low concentration (blue) and prolonged concentration step (black) stimuli. This cell-odor pair gives an excitatory response to both static stimuli, but greatly reduces its response after an upward concentration step. **B.** Same as (A), but for a different cell odor pair. This cell-odor pair gives little response to static stimuli, and responds strongly for decreasing concentration steps.
