# Supplementary material for: Odor Concentration Change Coding in the Olfactory Bulb
Source: PubMed Central journal article supplement (PMC6397952; doi:10.1523/eneuro.0396-18.2019), 2019-02-27
Supplement: sup_enu-eN-NWR-0396-18-s08.pdf [file sup_enu-eN-NWR-0396-18-s08.pdf]

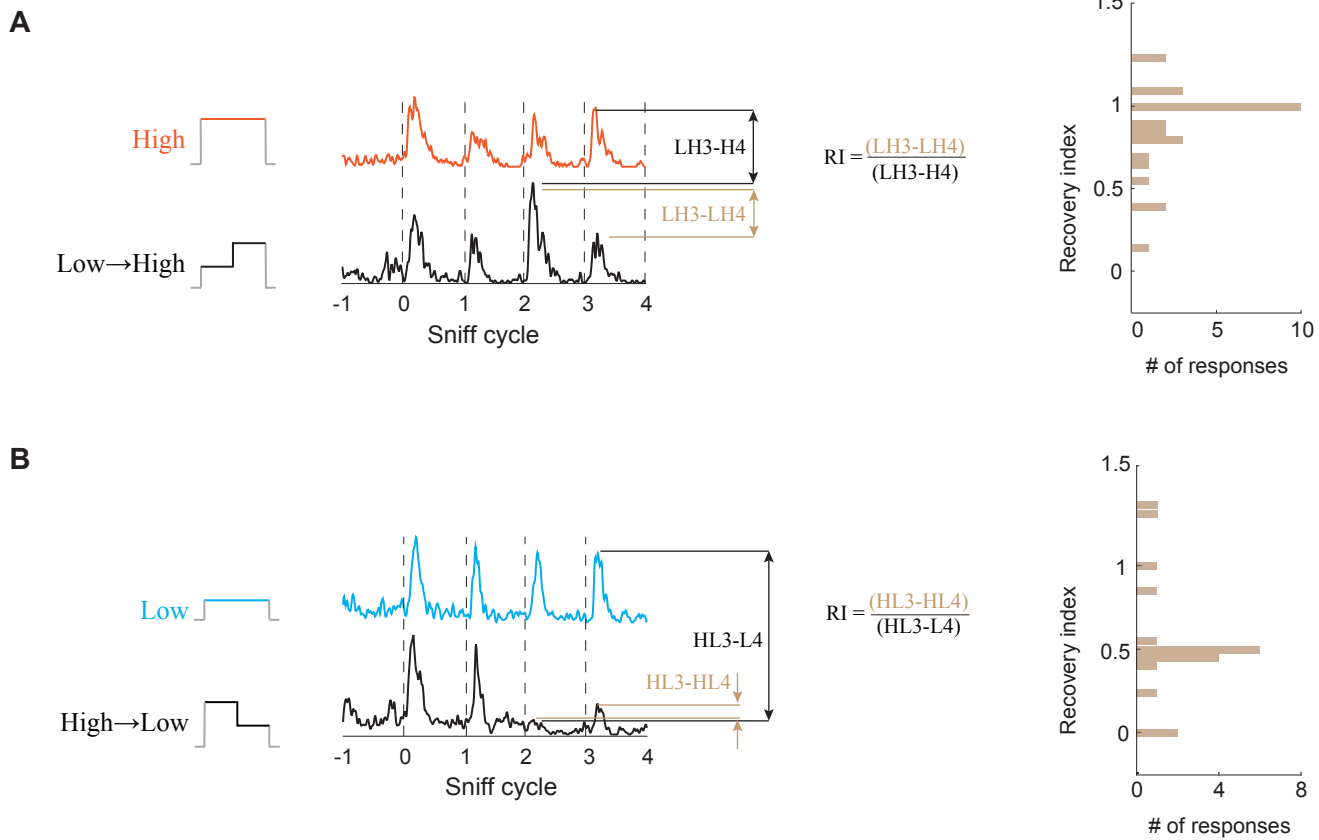

**Extended data Figure 2-3. Response recovery index.**

**A.** *Left.* Schematic of recovery index for  $+\Delta C_t$  responses. It is the ratio between change of response across two consecutive sniff cycles after the concentration step (LH3-LH4) to the difference between the  $\Delta C_t$  response and the response on the matching static stimulus (LH3-H3). *Right.* Distribution of recovery indices (same as Fig. 2E)

**B.** *Left.* Schematic of recovery index for  $-\Delta C_t$  responses:  $(HL3-HL4) / (HL3-L3)$ . *Right.* Distribution of recovery indices (same as Fig. 2F).
